# Supplementary material for: De Novo Transcriptome Analysis Reveals Putative Genes Involved in Anthraquinone Biosynthesis in Rubia yunnanensis
Source: MDPI journal article supplement (doi:10.3390/genes13030521), 2022-03-16
Supplement: s1 [file s1]

# DE Novo Transcriptome Analysis Reveals Putative Genes Involved in Anthraquinone Biosynthesis in *Rubia yunnanensis*

Rongfei Zhang <sup>1</sup>, Yuanyuan Miao <sup>1</sup>, Lingyun Chen <sup>1</sup>, Shanyong Yi <sup>1,2,\*</sup> and Ninghua Tan <sup>1,\*</sup>

<sup>1</sup> Department of TCMs Pharmaceuticals, School of Traditional Chinese Pharmacy, China Pharmaceutical University, Nanjing 211198, China; zrf1327182884@126.com (R.Z.); miaoyuanyuan1989@163.com (Y.M.); lychen@cpu.edu.cn (L.C.)

<sup>2</sup> Department of Biological and Pharmaceutical Engineering, West Anhui University, Lu'an 237012, China

\* Correspondence: 02000157@wxc.edu.cn (S.Y.); nhtan@cpu.edu.cn (N.T.)

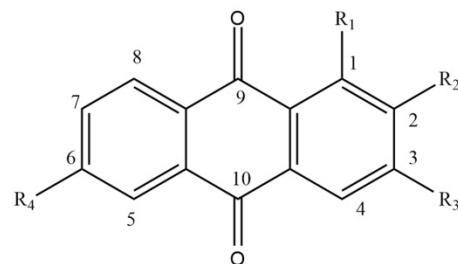

| Name                                                                                                                       | R <sub>1</sub> | R <sub>2</sub>                             | R <sub>3</sub>                       | R <sub>4</sub> |
|----------------------------------------------------------------------------------------------------------------------------|----------------|--------------------------------------------|--------------------------------------|----------------|
| 2-hydroxymethyl-1,3-dihydroxy-AQ-3-O- $\beta$ -D-xylopyranosyl-(1 $\rightarrow$ 6)- $\beta$ -D-glucopyranoside <b>Q12</b>  | OH             | CH <sub>2</sub> OH                         | OGlc(6 $\rightarrow$ 1)Xyl           | H              |
| 3-hydroxy-2-hydroxymethyl-AQ <b>Q4</b>                                                                                     | H              | CH <sub>2</sub> OH                         | OH                                   | H              |
| rubiquinone-3-O- $\beta$ -D-xylopranosyl-(1 $\rightarrow$ 6)- $\beta$ -D-glucopyranoside <b>Q20</b>                        | OH             | CH <sub>3</sub>                            | OGlc(6 $\rightarrow$ 1)Xyl           | OH             |
| rubiquinone-3-O-(4'-O-acetyl)- $\alpha$ -L-rhamnopyranosyl-(1 $\rightarrow$ 2)- $\beta$ -D-glucopyranoside <b>Q19</b>      | OH             | CH <sub>3</sub>                            | (4'-O-Ac)-OGlc(2 $\rightarrow$ 1)Rha | OH             |
| 1-hydroxy-2-hydroxymethylene-AQ-11-O- $\beta$ -D-glucopyranosyl-(1 $\rightarrow$ 6)- $\beta$ -D-glucopyranoside <b>Q11</b> | OH             | CH <sub>2</sub> OGlc(6 $\rightarrow$ 1)Glc | H                                    | H              |
| rubiquinone <b>Q3</b>                                                                                                      | OH             | CH <sub>3</sub>                            | OH                                   | OH             |

AQ: 9,10-anthraquinone

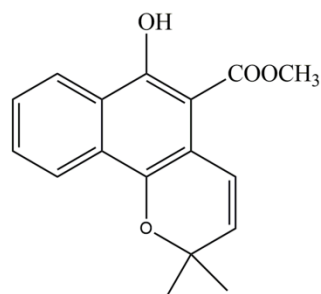

**Q17**  
Mollugin

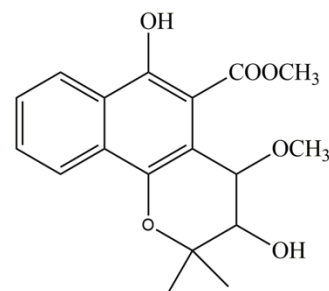

**Q18**  
1'-methoxy-2'-hydroxy-9,10-dihydromullugin

Supplementary Figure S1. Chemical structures of six anthraquinones and two naphthoquinones isolated from *R. yunnanensis*.



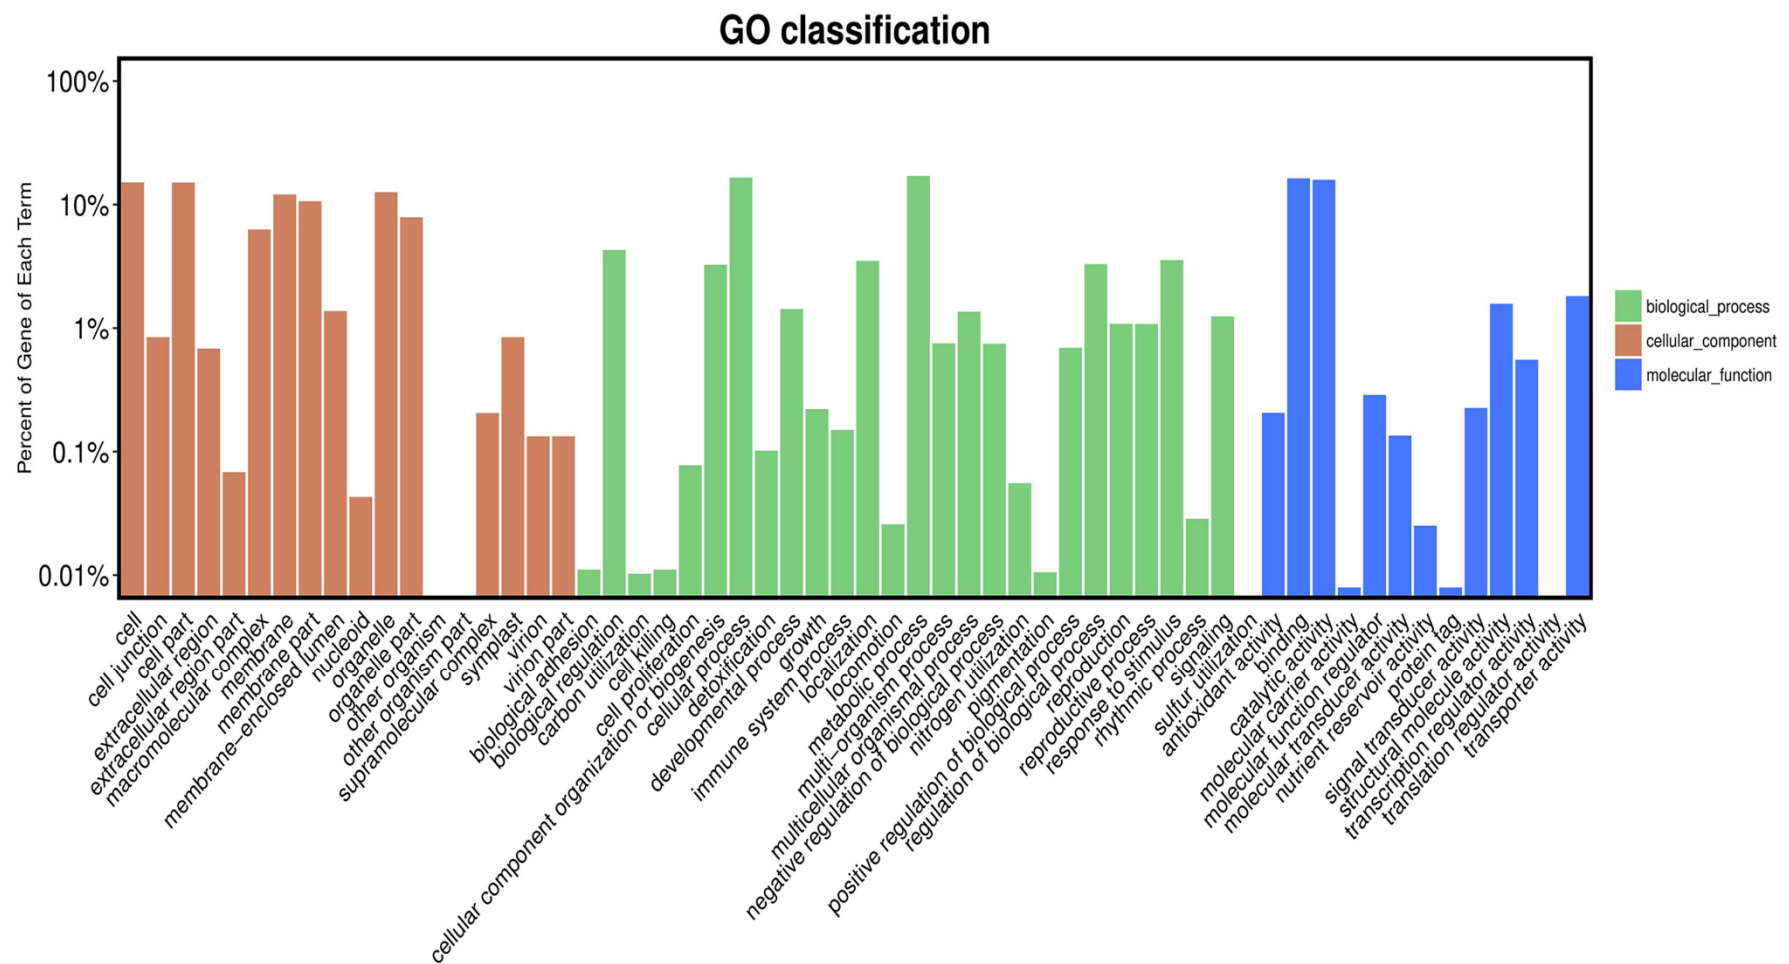

Supplementary Figure S3. GO classification of *R. yunnanensis* assembled transcripts.

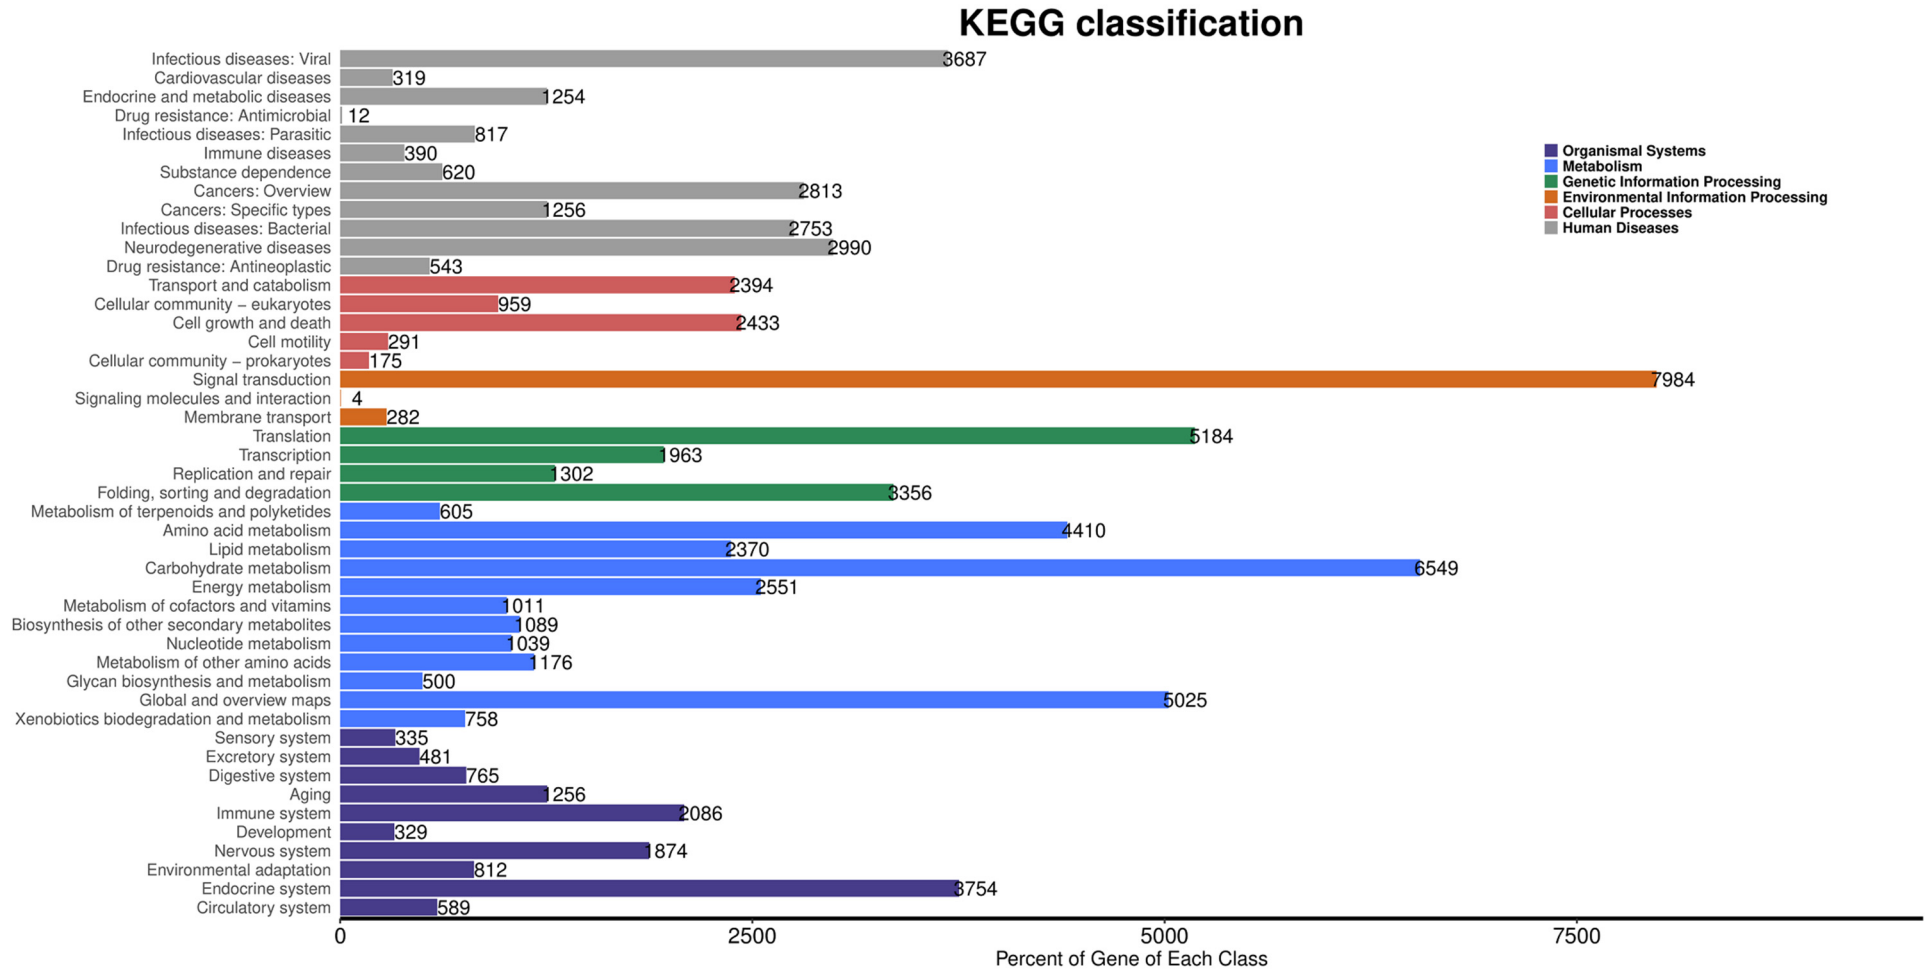

Supplementary Figure S4. KEGG classification of assembled transcripts from *R. yunnanensis*.

### Differentially expressed genes

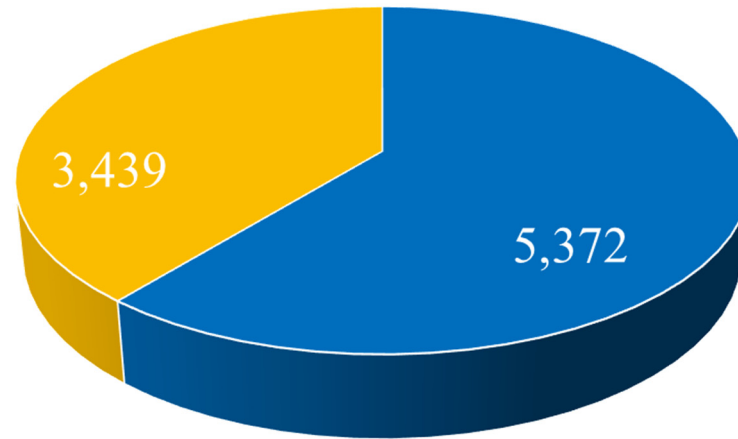

● Up-regulated genes      ● Down-regulated genes

**Supplementary Figure S5. Number of differentially expressed genes (DEGs) in the samples between roots (R) and a mixture of stems and leaves (SL) of *R. yunnanensis*.**

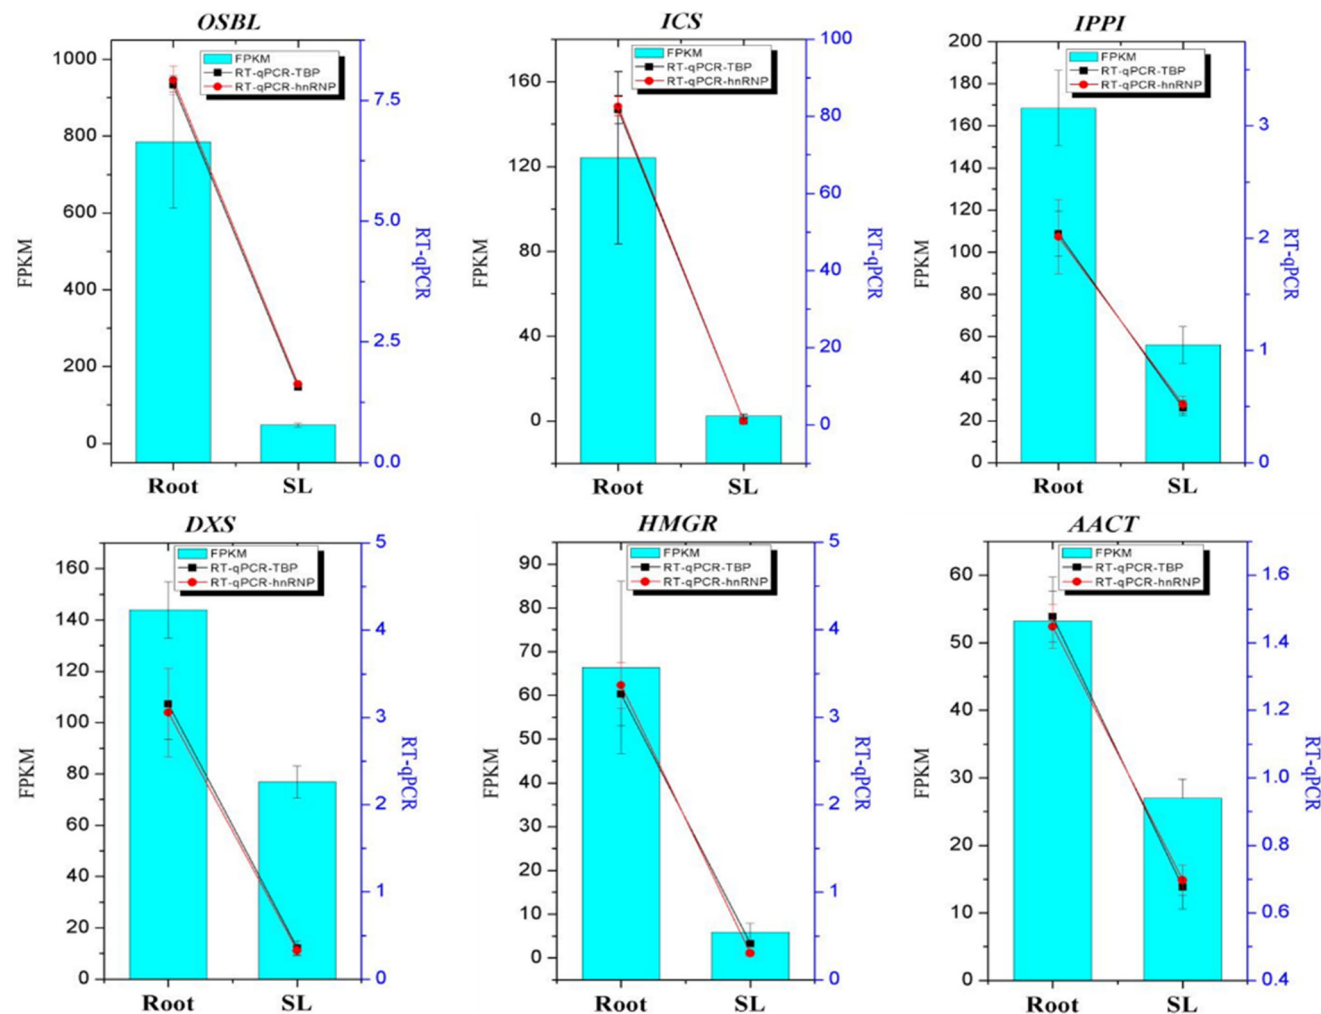

Supplementary Figure S6. RT-qPCR validation of the expression levels of six putative key genes involved in anthraquinone biosynthesis pathways. *hnRNP* and *TBP* were used as reference genes. Columns indicate relative expression levels of six genes measured by FPKM (left y-axis). [40]

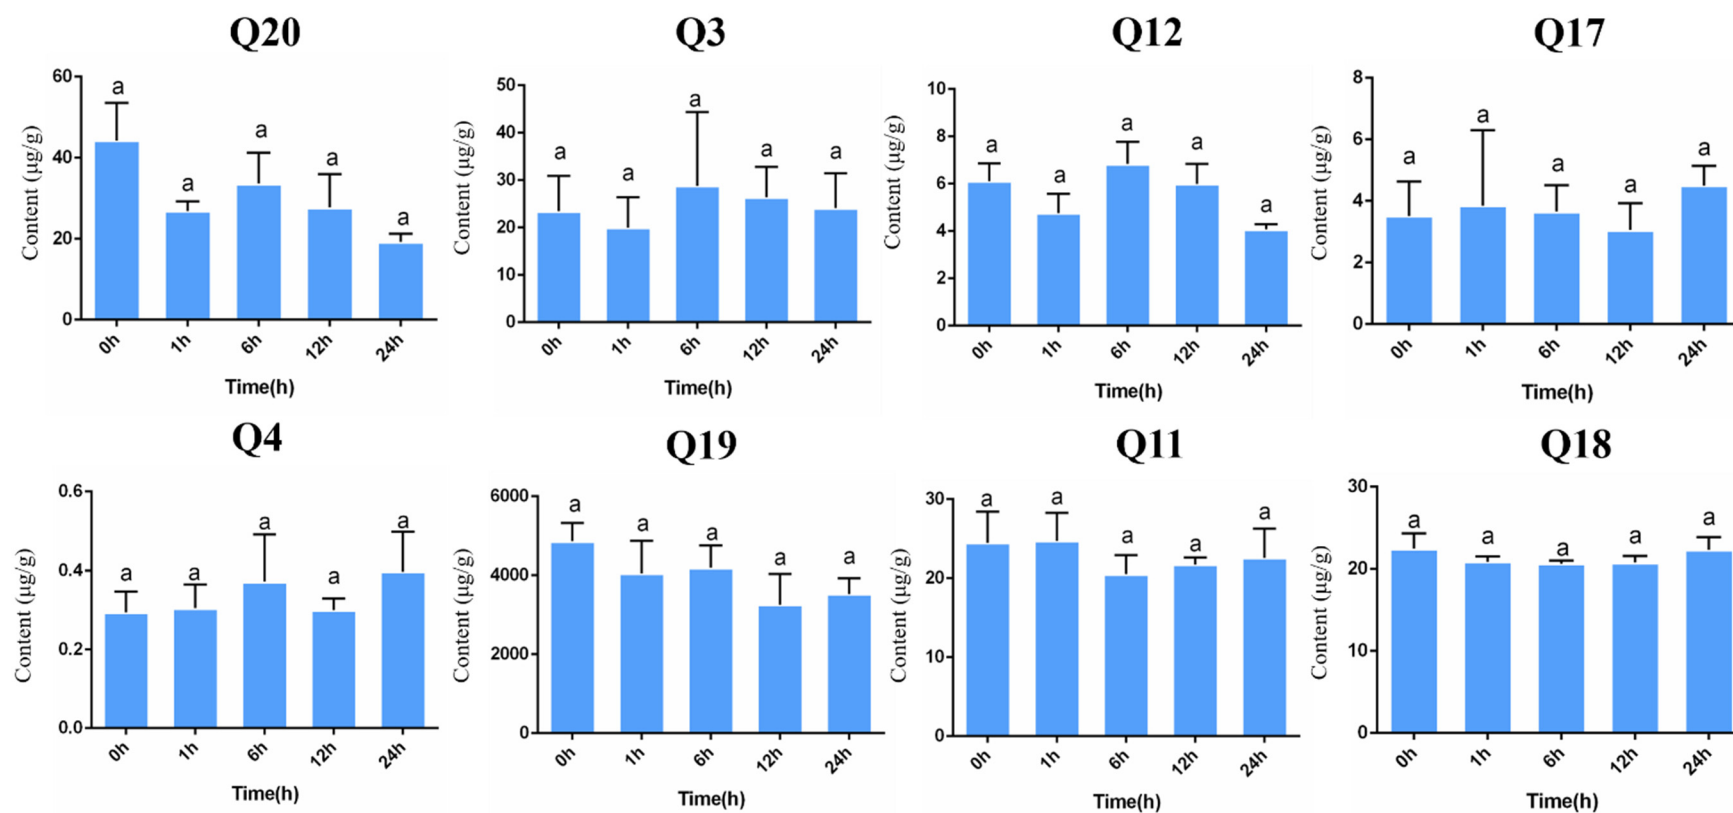

Supplementary Figure. S7. Contents of anthraquinones and naphthoquinones in the hairy roots of *R. yunnanensis* after 1, 6, 12, and 24 h' s MeJA treatment. Y-axis represents contents (μg/g) and X-axis represents MeJA inducing time.



Supplementary Table S1. RNA in roots (R), stems and leaves (SL) of *R. yunnanensis*.

| Sample  | Concentration<br>(ng/ $\mu$ L) | Total amount<br>( $\mu$ g) | OD260/280 | RIN | Volume<br>( $\mu$ L) |
|---------|--------------------------------|----------------------------|-----------|-----|----------------------|
| R1 RNA  | 340                            | 6.8                        | 2.126     | 8.3 | 20                   |
| R2 RNA  | 236                            | 4.7                        | 2.120     | 8.2 | 20                   |
| R3 RNA  | 171                            | 3.4                        | 2.130     | 8.0 | 20                   |
| SL1 RNA | 163                            | 3.3                        | 2.104     | 6.9 | 20                   |
| SL2 RNA | 225                            | 4.5                        | 2.146     | 6.6 | 20                   |
| SL3 RNA | 235                            | 4.7                        | 2.128     | 6.8 | 20                   |

RIN = RNA integrity number.

**Supplementary Table S2. The sequences of the primers for 15 genes involved in anthraquinone biosynthesis.**

| <b>Genes</b> | <b>Primer sequence (5'-3')</b>                               | <b>Primers Tm(°C)</b> |
|--------------|--------------------------------------------------------------|-----------------------|
| <i>OSBS</i>  | F: GGTACTTACGTCATTTTCTTGTCCT<br>R: TGAATATCAGCTACCAGTGGACTTG | 57.9/57.9             |
| <i>ICS</i>   | F: CATCCCTTCATCCAACTCCAG<br>R: GCTTCCTTCTACCACGCCA           | 57.6/57.3             |
| <i>HMGR</i>  | F: TTGAGGTCGGGACAGTAGGTG<br>R: CAGCAGCCGAGCATTGTA            | 59.5/54.9             |
| <i>DXS</i>   | F: TTCTCTGCCTACGGCTACTCTT<br>R: AACTTTTCGCTGCCTCGC           | 57.7/54.9             |
| <i>SD</i>    | F: AGACACTCATTTGTGCCCCATT<br>R: CACCTTCATACTGACCACCCTC       | 55.8/59.5             |
| <i>IPPI</i>  | F: AACCAGACGAGTTGAGGGA<br>R: ATGTCAATAGCATCAGTCAGGGT         | 57.4/56               |
| <i>ISPE</i>  | F: AGTTTTCGCTATCGCCTTCG<br>R: CATTACTGCTGCCACCACCT           | 55.4/57.4             |
| <i>PMVK</i>  | F: CAGTGGTGGCTTCTGCTCCT<br>R: CCAAGACCACGCCCAAGTA            | 59.5/57.3             |
| <i>SK</i>    | F: AATGATGGGCTCTGGCAA<br>R: TAGTTCCTCCAACCCCTTCC             | 53/57.4               |
| <i>DXR</i>   | F: GCCTGTTGAGAAGTTGAAAGAAG<br>R: GATGATGGATTGGGGGTGA         | 56/55.2               |
| <i>HMGS</i>  | F: TTTGCCCCGATTGGTGTTCA<br>R: CAAGGTCACGGCTTTGGTAG           | 53/57.4               |
| <i>MVK</i>   | F: CGTGTTGACGCTGCTACCTAC<br>R: TGCTTGAAAATGTGGGATGG          | 59.5/53.4             |
| <i>ISPF</i>  | F: AACAGAACGACGACGCATACC<br>R: GGCTGCTGAGACAAACGGA           | 57.6/57.3             |
| <i>AACT</i>  | F: GCTGTATCACTGGGGCATCC<br>R: CAAACACCTCCAACGCCTACT          | 59.5/57.6             |
| <i>OSBL</i>  | F: TGCTGGCTACACTGAGGATGA<br>R: CCTTGACCGCTGCTTGAAC           | 57.6/57.4             |

Supplementary Table S3. A summary of raw data. Roots (R1, R2 and R3), and a mixture of stems and leaves (SL1, SL2 and SL3) of *R. yunnanensis*.

| Sample | Read Len. | Raw Reads  | Clean Reads | Raw Base (G) | Clean Base (G) | Raw Q20 (%) | Clean Q20 (%) | Raw Q30 (%) | Clean Q30 (%) | Raw GC (%) | Clean GC (%) | Adapter (%) |
|--------|-----------|------------|-------------|--------------|----------------|-------------|---------------|-------------|---------------|------------|--------------|-------------|
| R1     | 150       | 43,202,582 | 41,132,788  | 6.48         | 6.17           | 94.16       | 95.09         | 87.87       | 89.18         | 50.54      | 50.77        | 1.54        |
| R2     | 150       | 36,888,628 | 34,612,412  | 5.53         | 5.19           | 93.19       | 94.7          | 86.46       | 88.5          | 50.04      | 50.32        | 2.03        |
| R3     | 150       | 42,808,828 | 41,342,472  | 6.42         | 6.2            | 94.73       | 95.42         | 88.72       | 89.72         | 50.13      | 50.14        | 1.36        |
| SL1    | 150       | 43,110,678 | 41,096,062  | 6.47         | 6.16           | 94.17       | 95.1          | 87.91       | 89.21         | 49.71      | 49.9         | 1.48        |
| SL2    | 150       | 43,747,160 | 41,363,450  | 6.56         | 6.2            | 93.81       | 94.99         | 87.47       | 89.08         | 48.18      | 48.36        | 1.95        |
| SL3    | 150       | 42,661,982 | 40,671,204  | 6.4          | 6.1            | 94.16       | 95.12         | 87.87       | 89.23         | 49.03      | 49.17        | 1.42        |

Supplementary Table S4. Statistics of transcript assembly.

| Item                         | Value   |
|------------------------------|---------|
| Total number sequences       | 636,198 |
| Total number of genes        | 554,646 |
| Total base of sequences (Mb) | 191     |
| Maximum sequence length (bp) | 11,222  |
| Minimum sequence length (bp) | 81      |
| Average sequence length (bp) | 300.64  |
| Median contig length (bp)    | 150     |
| N50 (bp)                     | 390     |
| Percent GC (%)               | 43.55   |

**Supplementary Table S5. Transcripts associated with ubiquinone and terpenoid-quinone biosynthesis according to the KEGG pathway mapping.**

| Pathway           | Enzyme name                                           | EC number | Gene        | Unigene                |
|-------------------|-------------------------------------------------------|-----------|-------------|------------------------|
| Shikimate pathway | shikimate dehydrogenase                               | 1.1.1.25  | <i>SD</i>   | TRINITY_DN43879_c0_g2  |
|                   | shikimate kinase                                      | 2.7.1.71  | <i>SK</i>   | TRINITY_DN107580_c0_g2 |
|                   | isochorismate synthase                                | 5.4.99.6  | <i>ICS</i>  | TRINITY_DN125672_c2_g2 |
|                   | o-succinylbenzoate-CoA ligase                         | 6.2.1.26  | <i>OSBL</i> | TRINITY_DN125216_c2_g1 |
| Terpenoid pathway | 3-hydroxy-3-methylglutaryl-coenzyme A reductase       | 1.1.1.34  | <i>HMGR</i> | TRINITY_DN129754_c4_g1 |
|                   | 1-deoxy-D-xylulose-5-phosphate reductoisomerase       | 1.1.1.267 | <i>DXR</i>  | TRINITY_DN129547_c2_g3 |
|                   | mevalonate kinase                                     | 2.7.1.36  | <i>MVK</i>  | TRINITY_DN130215_c1_g2 |
|                   | phosphomevalonate kinase                              | 2.7.4.2   | <i>PMVK</i> | TRINITY_DN28921_c0_g1  |
|                   | isopentenyl-diphosphate delta-isomerase               | 5.3.3.2   | <i>IPPI</i> | TRINITY_DN131965_c2_g1 |
|                   | acetyl-CoA acetyltransferase                          | 2.3.1.9   | <i>AACT</i> | TRINITY_DN302889_c0_g1 |
|                   | 1-deoxy-D-xylulose-5-phosphate synthase               | 2.2.1.7   | <i>DXS</i>  | TRINITY_DN124410_c3_g1 |
|                   | 2-C-methyl-D-erythritol 2,4-cyclodiphosphate synthase | 4.6.1.12  | <i>ISPF</i> | TRINITY_DN122309_c0_g1 |
|                   | 4-diphosphocytidyl-2C-methyl-D-erythritol kinase      | 2.7.1.148 | <i>ISPE</i> | TRINITY_DN126438_c0_g1 |
|                   | 3-hydroxy-3-methylglutaryl coenzyme A synthase        | 2.3.3.10  | <i>HMGS</i> | TRINITY_DN131039_c3_g1 |
|                   | o-succinylbenzoate synthase                           | 4.2.1.113 | <i>OSBS</i> | TRINITY_DN319173_c0_g1 |

**Supplementary Table S6. Correlation values between 15 genes involved in the anthraquinone biosynthesis and the contents of six anthraquinones and two naphthoquinones.**

| Metabolites | Q20     |       | Q18     |       | Q19      |       | Q4      |       | Q12     |       | Q11     |       | Q3      |       | Q17     |       |
|-------------|---------|-------|---------|-------|----------|-------|---------|-------|---------|-------|---------|-------|---------|-------|---------|-------|
| Gene        | Pearson | P     | Pearson | P     | Pearson  | P     | Pearson | P     | Pearson | P     | Pearson | P     | Pearson | P     | Pearson | P     |
| <i>IPPI</i> | -0.129  | 0.647 | -0.26   | 0.349 | -0.459   | 0.085 | 0.140   | 0.618 | 0.077   | 0.786 | -0.254  | 0.361 | 0.33    | 0.230 | -0.057  | 0.841 |
| <i>ISPF</i> | -0.525  | 0.044 | -0.12   | 0.670 | -0.721** | 0.002 | 0.09    | 0.749 | 0.071   | 0.801 | -0.266  | 0.337 | -0.133  | 0.036 | -0.058  | 0.862 |
| <i>ISPE</i> | -0.288  | 0.298 | -0.322  | 0.241 | -0.671*  | 0.006 | 0.088   | 0.755 | -0.0108 | 0.703 | -0.211  | 0.45  | 0.310   | 0.260 | -0.049  | 0.714 |
| <i>SD</i>   | -0.259  | 0.352 | -0.265  | 0.341 | -0.471   | 0.072 | 0.149   | 0.596 | 0.047   | 0.867 | -0.273  | 0.325 | 0.502*  | 0.045 | -0.1    | 0.724 |
| <i>SK</i>   | 0.206   | 0.461 | -0.458  | 0.086 | -0.205   | 0.463 | 0.149   | 0.597 | 0.139   | 0.621 | 0.074   | 0.795 | 0.424   | 0.116 | -0.412  | 0.127 |
| <i>HMGS</i> | 0.115   | 0.682 | -0.501  | 0.057 | -0.277   | 0.318 | -0.092  | 0.744 | 0.219   | 0.433 | -0.274  | 0.324 | 0.261   | 0.347 | -0.238  | 0.392 |
| <i>HMGR</i> | 0.648*  | 0.009 | 0.142   | 0.615 | 0.493    | 0.062 | -0.307  | 0.266 | 0.169   | 0.547 | 0.404   | 0.135 | -0.219  | 0.433 | -0.135  | 0.632 |
| <i>ICS</i>  | -0.322  | 0.242 | 0.079   | 0.781 | -0.403   | 0.137 | 0.017   | 0.951 | -0.203  | 0.467 | 0.129   | 0.646 | -0.083  | 0.768 | 0.278   | 0.315 |
| <i>AACT</i> | 0.679   | 0.005 | -0.115  | 0.684 | 0.324    | 0.239 | -0.256  | 0.358 | 0.338   | 0.218 | 0.337   | 0.219 | 0.119   | 0.672 | -0.310  | 0.260 |
| <i>MVK</i>  | 0.694** | 0.004 | -0.237  | 0.395 | 0.167    | 0.551 | -0.144  | 0.608 | 0.507   | 0.054 | -0.095  | 0.735 | 0.191   | 0.496 | -0.384  | 0.157 |
| <i>PMVK</i> | 0.797*  | 0.003 | 0.10    | 0.724 | 0.615*   | 0.015 | -0.29   | 0.294 | 0.362   | 0.184 | 0.328   | 0.233 | -0.133  | 0.636 | -0.217  | 0.437 |
| <i>DXS</i>  | 0.002   | 0.995 | -0.343  | 0.21  | -0.187   | 0.505 | 0.157   | 0.576 | 0.063   | 0.824 | -0.329  | 0.184 | 0.140   | 0.618 | -0.009  | 0.975 |
| <i>DXR</i>  | -0.064  | 0.822 | -0.348  | 0.204 | -0.266   | 0.328 | 0.245   | 0.378 | 0.094   | 0.738 | -0.352  | 0.198 | 0.398   | 0.142 | -0.088  | 0.756 |
| <i>OSBL</i> | -0.054  | 0.849 | -0.251  | 0.355 | 0.427    | 0.113 | 0.121   | 0.668 | 0.293   | 0.288 | -0.274  | 0.323 | 0.4     | 0.139 | -0.228  | 0.414 |
| <i>OSBS</i> | -0.096  | 0.734 | -0.446  | 0.096 | -0.363   | 0.184 | 0.092   | 0.745 | -0.035  | 0.902 | -0.340  | 0.215 | 0.238   | 0.382 | -0.124  | 0.660 |
